# Supplementary material for: Ecological determinants of Cope’s rule and its inverse
Source: PubMed Central journal article supplement (PMC10796397; doi:10.1038/s42003-023-05375-z), 2024-01-18
Supplement: 42003_2023_5375_MOESM2_ESM.pdf [file 42003_2023_5375_MOESM2_ESM.pdf]

## **Description of Additional Supplementary Files**

**File name:** Movie S1

**Description:** Dynamics of the community coevolution shown in Figure 1.

**File name:** Movie S2

**Description:** Dynamics of the community coevolution shown in Figure 2.

**File name:** Movie S3

**Description:** Dynamics of the community coevolution shown in Figure 3.

**File name:** Movie S4

**Description:** Dynamics of the community coevolution shown in Figure 4.
